# Supplementary material
Source: Springer Nature journal article supplement (https://www.springermedizin.de/resource/supplementary/12974_2013_921_MOESM2_ESM.pdf/9600360)

(a)

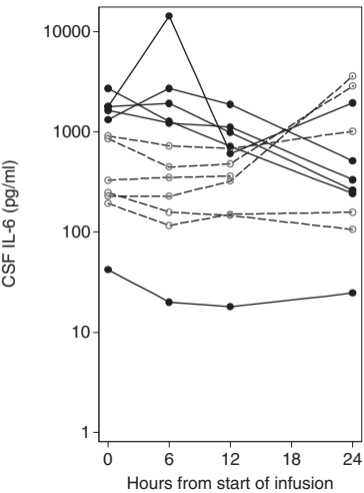

(b)

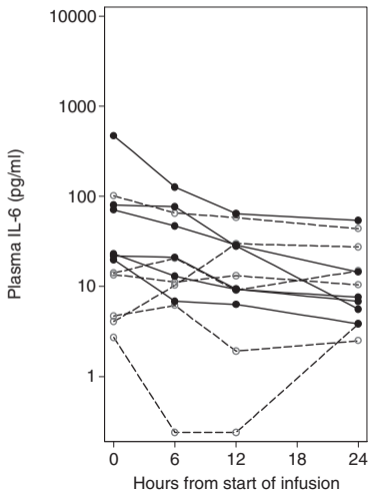

Supplement: MOESM2 [file 9600360]
